# Supplementary material for: DNA methylation profiling improves routine diagnosis of paediatric central nervous system tumours: A prospective population‐based study
Source: PubMed Central journal article supplement (PMC9543790; doi:10.1111/nan.12838), 2022-08-03
Supplement: NAN-48-0-s003.pdf [file NAN-48-0-s003.pdf]

| Sample-ID | v11.4                |           | v12.5                        |                      |                              |                 |                  |                | MB classifier 1.0         |                   |            |          |
|-----------|----------------------|-----------|------------------------------|----------------------|------------------------------|-----------------|------------------|----------------|---------------------------|-------------------|------------|----------|
|           | Prediction           | Max score | prediction superfamily       | maxscore superfamily | prediction family            | maxscore family | prediction class | maxscore class | prediction subclass       | maxscore subclass | prediction | maxscore |
| 1         | MB, subclass group 3 | 0.990     | MB non-WNT/non-SHH activated | 0.999                | MB non-WNT/non-SHH activated | 0.999           | MB Group 3       | 0.997          | MB Group 3, subclass III  | 0.781             | III        | 0.945    |
| 2         | MB, subclass group 4 | 0.990     | MB non-WNT/non-SHH activated | 1.000                | MB non-WNT/non-SHH activated | 1.000           | MB Group 4       | 1.000          | MB Group 4, subclass VI   | 0.994             | VI         | 0.997    |
| 3         | MB, subclass group 4 | 0.900     | MB non-WNT/non-SHH activated | 1.000                | MB non-WNT/non-SHH activated | 1.000           | MB Group 4       | 1.000          | MB Group 4, subclass V    | 1.000             | V          | 1.000    |
| 4         | MB, subclass group 4 | 0.960     | MB non-WNT/non-SHH activated | 1.000                | MB non-WNT/non-SHH activated | 1.000           | MB Group 4       | 0.958          | MB Group 4, subclass V    | 0.956             | V          | 0.996    |
| 5         | MB, subclass group 4 | 0.960     | MB non-WNT/non-SHH activated | 1.000                | MB non-WNT/non-SHH activated | 1.000           | MB Group 4       | 0.999          | MB Group 4, subclass V    | 0.997             | V          | 0.981    |
| 6         | MB, subclass group 4 | 0.990     | MB non-WNT/non-SHH activated | 1.000                | MB non-WNT/non-SHH activated | 1.000           | MB Group 4       | 1.000          | MB Group 4, subclass VIII | 1.000             | VIII       | 0.999    |
| 7         | MB, subclass group 4 | 0.990     | MB non-WNT/non-SHH activated | 0.999                | MB non-WNT/non-SHH activated | 0.999           | MB Group 4       | 0.997          | MB Group 4, subclass VI   | 0.802             | VI         | 0.979    |
| 8         | MB, subclass group 4 | 0.990     | MB non-WNT/non-SHH activated | 0.997                | MB non-WNT/non-SHH activated | 0.997           | MB Group 4       | 0.996          | MB Group 4, subclass VIII | 0.650             | VI         | 0.795    |
| 9         | MB, subclass group 4 | 0.990     | MB non-WNT/non-SHH activated | 0.999                | MB non-WNT/non-SHH activated | 0.999           | MB Group 4       | 0.999          | MB Group 4, subclass VIII | 0.997             | VIII       | 0.999    |
| 10        | MB, subclass group 4 | 0.990     | MB non-WNT/non-SHH activated | 0.998                | MB non-WNT/non-SHH activated | 0.998           | MB Group 4       | 0.998          | MB Group 4, subclass VIII | 0.796             | VI         | 0.583    |
| 11        | MB, subclass group 4 | 0.990     | MB non-WNT/non-SHH activated | 0.999                | MB non-WNT/non-SHH activated | 0.999           | MB Group 4       | 0.990          | MB Group 4, subclass VII  | 0.970             | VII        | 0.992    |
| 12        | MB, subclass group 4 | 0.990     | MB non-WNT/non-SHH activated | 1.000                | MB non-WNT/non-SHH activated | 1.000           | MB Group 4       | 1.000          | MB Group 4, subclass VIII | 1.000             | VIII       | 1.000    |
| 13        | MB, subclass group 3 | 0.990     | MB non-WNT/non-SHH activated | 0.999                | MB non-WNT/non-SHH activated | 0.999           | MB Group 3       | 0.999          | MB Group 3, subclass II   | 0.993             | II         | 0.944    |
| 14        | MB, subclass group 4 | 0.990     | MB non-WNT/non-SHH activated | 1.000                | MB non-WNT/non-SHH activated | 1.000           | MB Group 4       | 1.000          | MB Group 4, subclass V    | 1.000             | V          | 1.000    |
| 15        | MB, subclass group 4 | 0.990     | MB non-WNT/non-SHH activated | 1.000                | MB non-WNT/non-SHH activated | 1.000           | MB Group 4       | 0.999          | MB Group 4, subclass VI   | 0.818             | VI         | 0.861    |
| 16        | MB, subclass group 3 | 0.990     | MB non-WNT/non-SHH activated | 1.000                | MB non-WNT/non-SHH activated | 1.000           | MB Group 3       | 1.000          | MB Group 3, subclass II   | 1.000             | II         | 0.998    |
| 17        | MB, subclass group 4 | 0.990     | MB non-WNT/non-SHH activated | 1.000                | MB non-WNT/non-SHH activated | 1.000           | MB Group 4       | 1.000          | MB Group 4, subclass VI   | 1.000             | VI         | 0.998    |
| 18        | MB, subclass group 3 | 0.990     | MB non-WNT/non-SHH activated | 1.000                | MB non-WNT/non-SHH activated | 1.000           | MB Group 3       | 1.000          | MB Group 3, subclass IV   | 0.999             | IV         | 0.997    |
| 19        | MB, subclass group 4 | 0.990     | MB non-WNT/non-SHH activated | 1.000                | MB non-WNT/non-SHH activated | 1.000           | MB Group 4       | 1.000          | MB Group 4, subclass VIII | 1.000             | VIII       | 0.999    |
| 20        | MB, subclass group 4 | 0.990     | MB non-WNT/non-SHH activated | 1.000                | MB non-WNT/non-SHH activated | 1.000           | MB Group 4       | 1.000          | MB Group 4, subclass VI   | 0.999             | VI         | 0.995    |
| 21        | MB, subclass group 4 | 0.990     | MB non-WNT/non-SHH activated | 1.000                | MB non-WNT/non-SHH activated | 1.000           | MB Group 4       | 1.000          | MB Group 4, subclass VII  | 1.000             | VII        | 1.000    |
| 22        | MB, subclass group 4 | 0.990     | MB non-WNT/non-SHH activated | 1.000                | MB non-WNT/non-SHH activated | 1.000           | MB Group 4       | 1.000          | MB Group 4, subclass VIII | 1.000             | VIII       | 0.999    |
| 23        | MB, subclass group 4 | 0.860     | MB non-WNT/non-SHH activated | 0.999                | MB non-WNT/non-SHH activated | 0.999           | MB Group 4       | 0.997          | MB Group 4, subclass VII  | 0.996             | VII        | 0.997    |
| 24        | MB, subclass group 4 | 0.990     | MB non-WNT/non-SHH activated | 0.999                | MB non-WNT/non-SHH activated | 0.999           | MB Group 4       | 0.999          | MB Group 4, subclass VI   | 0.959             | VI         | 0.979    |
| 25        | MB, subclass group 4 | 0.990     | MB non-WNT/non-SHH activated | 1.000                | MB non-WNT/non-SHH activated | 1.000           | MB Group 4       | 1.000          | MB Group 4, subclass VIII | 1.000             | VIII       | 0.999    |
| 26        | MB, subclass group 4 | 0.990     | MB non-WNT/non-SHH activated | 1.000                | MB non-WNT/non-SHH activated | 1.000           | MB Group 4       | 1.000          | MB Group 4, subclass VI   | 0.770             | VI         | 0.930    |

MB; medulloblastoma
